# Supplementary material for: EARLY IN SHORT DAYS 1(ESD1) encodes ACTIN-RELATED PROTEIN 6 (AtARP6), a putative component of chromatin remodelling complexes that positively regulatesFLCaccumulation inArabidopsis
Source: Oxford University Press journal article supplement (doi:10.1242/dev.02301), 2006-02-23
Supplement: dev02301tables.pdf [file dev02301tables.pdf]

**Table S1. Molecular markers of chromosome 3 used in the chromosomal location of the *esd1* mutation**

| Marker     | Type | Location |
|------------|------|----------|
| GAPab      | SSLP | 43.77 cM |
| GL1        | CAPS | 48.45 cM |
| ATPOX      | CAPS | 52.40 cM |
| Centromere |      |          |
| ATA1       | CAPS | 53.87 cM |
| NIT1.2     | SSLP | 55.12 cM |
| TOPP5      | CAPS | 59.20 cM |
| ASN1       | CAPS | 61.42 cM |
| nga6       | SSLP | 86.41 cM |

**Table S2. Markers used to fine map the *esd1* mutation**

| Marker | Type | Restriction enzyme | Forward                  | Reverse                    |
|--------|------|--------------------|--------------------------|----------------------------|
| ATPOX  | CAPS | <i>Msp</i> el      | TCTGCTGCGGTGGGAATACAAAAG | GCCATCATTCCCCGTTCTCATAG    |
| MIJ6*  | CAPS | <i>Dde</i> l       | CATTCCGCATTATTATCTACCC   | CAAGTGACAATACAGCGGAAC      |
| T25C10 | SSLP | –                  | TAGGGGACATATCAAACCAAC    | GTCTAAAACCATCTTCACCATAAT   |
| T8N9*  | SSLP | –                  | TGCTCGTCATCTCTTGTGTGTG   | CTTCTCATTCTGTAAACCGCA      |
| T15D2* | CAPS | <i>Xba</i> l       | TGAGGTAGTGGAGGAGAAAACG   | TTGATGTATGGGGGATTGATTT     |
| T21P20 | CAPS | <i>Mse</i> l       | CAAGCTTCATGGGGACTAGCTAG  | TAATACGGGACAATCTACAACAC    |
| T27B3* | CAPS | <i>Taq</i> l       | AGAATCAATGCCTATCAAGACAC  | CAACTAAGAGACTGATCATAAAATAA |
| ATA1   | CAPS | <i>Nai</i> lll     | ATGATCAAAGGGGGACGAGG     | AAGGAAACACCACCAAACGAAAAC   |

\*Molecular markers developed during this work.

**Table S3. Molecular markers used for the analysis of the deleted regions in the *esd1* alleles**

| BAC    | Marker   | Forward                   | Reverse                    | Deleted in allele |
|--------|----------|---------------------------|----------------------------|-------------------|
| F1D9   | F1D9     | CACTCTTGCTGTTGTTTTCTTA    | GAAAGTTGAGATGACGTATTG      | 4                 |
| T7B9   | 1.T7B9   | TACTCTAACCCATCTCAGCAAC    | TTCCACCATCATCCACCACTC      | 4                 |
|        | 2.T7B9   | CTTTGGTTGCGAGAGACAGG      | GTTGTTCATCCTGTATTGTTCTG    | 4                 |
|        | 3.T7B9   | TTGGCTTGGATGAGTTCGG       | ATCCGCTTACCACATCCCACTC     | 4                 |
|        | 4.T7B9   | TCCTCCTCGTCGTCGGTGC       | ACTCCACGGGCATTCCGCT        | 4                 |
| T13O13 | 1.T13O13 | TCTCAAATGGCTCTACTCGTGC    | ACGGTTTTCTTCGGCTTTC        | 4                 |
|        | 5.T13O13 | GCAACTGCTACAGCCCCG        | CGAATCTGTGGCTGGCCACGCGG    | 4                 |
|        | 2.T13O13 | ATGACTTCTACTTCCGCTGC      | GCTATGGTCAGTTGTCCGTT       | 4                 |
|        | 3.T13O13 | ATGGAGAGACAGAAAAAGAAGTTG  | TTTCAGCCGCATTTGTATTCT      | 4                 |
| T15D2  | 4.T13O13 | ATGGTTACCAGATTTAAGTGTCT   | TCTGGATCATCTCGTCTCC        | 4                 |
|        | 1.T15D2  | AAGCTTGACAAGCTAGTAAACCTA  | AAGTCTATTCAGAAATTGACTAAGTG | 4                 |
|        | 2.T15D2  | CCACAACAACGGAGGTATCG      | GCTGTGGGTCATACTCCTTTTT     | 4                 |
|        | 3.T15D2  | AACCTTGTCTTTTTTGTGATTAG   | TACCAACCATCATCCTCTTCTC     | 4                 |
|        | 4.T15D2  | ATTTGGTGTATGTTCTTTCGGTCC  | TAGATAGTGAACGCAACAAATAGA   | 4                 |
|        | 5.T15D2  | TTTTACGGCTCCCTCAAGC       | AACTCCCGCTCTTCTGTCTACC     | 4                 |
|        | 6.T15D2  | TATTCTGGGCTTGAGGGTAGTA    | CACAACACTCTCTCCCATCTCA     | 4                 |
| F21A14 | 3.F21A14 | ATTCCTCCATCTTCTTCCATCA    | CGAGCACTTGTCTTGGACTTCAT    | 1-5, 7-9          |
|        | 4.F21A14 | TGGTCCGCACAACATCTTAT      | TGCCGAACCTCATCTCCACATC     | 1-5, 7-9          |
|        | 5.F21A14 | AATCCTCACCTTCCCTTGCCA     | TCTTCTTCTCTTCTTGTGCTTGA    | 1-5, 7-9          |
|        | 2.F21A14 | TCCTCGGATTCCTGGCA         | ACTTGGGTCGGATTCAAGGC       | 1-9               |
|        | 1.F21A14 | ATTGTTTTGGGGGATGGGC       | CGAGTGTCTGTTGAGTGCGGAA     | 1-9               |
| T4P3   | 4.T4P3   | ATGATGATGCCCTCGTAGTTA     | ACATACACGCCACTTGCCATTT     | 1-9               |
|        | 1.T4P3   | TAAATGTGAGCAATCCCTGAG     | ACTTGCCTGCTCCTTCTCTGTGCG   | 1-9               |
|        | 2.T4P3   | CGGTCTCTTGCCTTTCCTCT      | GCTGCCTCTCTTCCAACCTCGG     | 1-9               |
|        | 3.T4P3   | TTTTGGGTGCGTTTTTGAATCCTA  | TAGGATTTTTGCTGCTTCATACTTA  | 1-9               |
| T14A11 | 4.T14A11 | TCAGCATCTTCTGTGCGAGGA     | ATCCCGACTTCTCATTACCTC      | 1-9               |
|        | 3.T14A11 | ATCGTGTCTTCCAGGTTTTGA     | TAACCTCCAACCTTCTCCAATCTA   | 1-9               |
|        | 2.T14A11 | TTCTTCCCCTCTTCTTCTCTTG    | GGCGTAGTCCTTGTCCATTGTCA    | 1-9               |
|        | 1.T14A11 | TCCAACCTTTATCTCATTACTGT   | CATTCTTTAGTGTCTGATTTCCG    | 3-9               |
| T26P13 | 4.T26P13 | AAGATTGTAGGGAGATTGTGATAA  | CGTTTTGGTGTAGTGATCCCGATT   | 3-9               |
|        | 3.T26P13 | ACTGATGTTGAGGCGGGAAGGTTT  | GCTTTGCGGTAATGGTCGTTCTTC   | 3-9               |
|        | 2.T26P13 | AGAAGGGTTGAAGCGGGTGTG     | GCTACAGGTTTTGGTGGGAAGAA    | 3-9               |
|        | 1.T26P13 | ACCACTGCTGTCAATTGCTCGGGAA | CGCCTCTTTGTCTTCTTCTTC      | 3-9               |
| T25F15 | 1.T25F15 | ATATTTTTTTCAGTCAACAGAGTG  | CGAGTGGGTATGCTTCAGGAGAT    | 6, 9              |
